# Supplementary material for: Reducing properties of 1,2-dipyridyl-1,2-disodioethanes: chemical validation of theoretical and electrochemical predictions
Source: Royal Society of Chemistry journal article supplement (doi:10.1039/c6ra03303b), 2016-01-01
Supplement: c6ra03303b1.pdf [file c6ra03303b1.pdf]

## *Electronic Supplementary Information*

### **Reducing Properties of 1,2-Dipyridyl-1,2-disodioethanes: Chemical Validation of Theoretical and Electrochemical Predictions**

Ugo Azzena,<sup>\*,†</sup> Massimo Carraro,<sup>†</sup> Luisa Pisano<sup>†</sup>

<sup>†</sup>*Dipartimento di Chimica e Farmacia, Università di Sassari, via Vienna 2, I-07100 Sassari, Italy*

Francesca Mocci<sup>\*,‡</sup>

<sup>‡</sup>*Dipartimento di Chimica e Geologia, Università di Cagliari, Complesso Universitario, S.S. 554 bivio per Sestu, I – 09042 Monserrato (Ca), Italy*

Sabrina Antonello,<sup>‡</sup> Flavio Maran<sup>\*,‡</sup>

<sup>‡</sup>*Dipartimento di Scienze Chimiche, Università di Padova, via Marzolo 1, I-35131 Padova, Italy*

#### **ASSOCIATED CONTENT**

**Table S1:** Sum of the Electronic and Zero Point Energy for stable minima of compounds **1a-d**, **2a-d**, **3a-d** calculated *in vacuo* at the PBE0/6-311+G(d,p) level.....S3

**Table S2:** LUMO energies (eV) for compounds **1**, and SOMO energies (eV) for compounds **2**.S4

**Figure S1.** PBE0/6-311+G(d,p)/IEFPCM(DMF) global minima for compounds **1a-d**.....S5

**Figure S2** Spin density, calculated at the PBE0/6-311+G(d,p)/IEFPCM(DMF) level. The blue surfaces connect the points where the spin density is 0.02 au/A<sup>3</sup>.....S5

<sup>1</sup>H NMR (400 MHz) in CDCl<sub>3</sub> of 1-(2-Pyridyl)-2-(4-pirydy)ethane (**4a**).....S6

<sup>13</sup>C NMR (100 MHz) in CDCl<sub>3</sub> of 1-(2-Pyridyl)-2-(4-pirydy)ethane (**4a**).....S7

|                                                                                                                               |     |
|-------------------------------------------------------------------------------------------------------------------------------|-----|
| <sup>1</sup> H NMR (400 MHz) in CDCl <sub>3</sub> of 1,2-Dideutero-1-(2-Pyridyl)-2-(4-pirydy)ethane (4a <sub>d2</sub> ).....  | S8  |
| <sup>13</sup> C NMR (100 MHz) in CDCl <sub>3</sub> of 1,2-Dideutero-1-(2-Pyridyl)-2-(4-pirydy)ethane (4a <sub>d2</sub> )..... | S9  |
| <sup>1</sup> H-NMR (300 MHz) in CDCl <sub>3</sub> of 2-(2-Bromophenyl)-3-methylbutanoic acid (6a).....                        | S10 |
| <sup>13</sup> C-NMR (75 MHz) in CDCl <sub>3</sub> of 2-(2-Bromophenyl)-3-methylbutanoic acid (6a).....                        | S11 |
| <sup>1</sup> H-NMR (300 MHz) in CDCl <sub>3</sub> of 2-(2-Bromophenyl)hexanoic acid (6b).....                                 | S12 |
| <sup>13</sup> C-NMR (75 MHz) in CDCl <sub>3</sub> of 2-(2-Bromophenyl)hexanoic acid (6b).....                                 | S13 |

**Table S1:** Sum of the Electronic and Zero Point Energy for minimum energy of compounds **1a-d**, **2a-d**, **3a-d** calculated *in vacuo* at the PBE0/6-311+G(d,p) level

|           | Conf Name | Ce=Ce-Ci=N |      | E(Hartree) |           |
|-----------|-----------|------------|------|------------|-----------|
|           |           | Ar         | Ar'  | In vacuo   | PCM       |
| <b>3a</b> | aZ        | 0°         | -    | -571.9840  | -572.2642 |
| <b>2a</b> |           | 0°         | -    | -572.0907  | -572.1846 |
| <b>1a</b> |           | 0°         | -    | -572.0509  | -572.0819 |
| <b>3a</b> | aE        | 180°       | -    | -571.9851  | -572.2629 |
| <b>2a</b> |           | 180°       | -    | -572.0904  | -572.1839 |
| <b>1a</b> |           | 180°       | -    | -572.0492  | -572.0811 |
| <b>3b</b> | bZZ       | 0°         | 0°   | -571.9724  | -572.2589 |
| <b>2b</b> |           | 0°         | 0°   | -572.0858  | -572.1827 |
| <b>1b</b> |           | 0°         | 0°   | -572.0546  | -572.0834 |
| <b>3b</b> | bZE       | 0°         | 180° | -571.9724  | -572.2573 |
| <b>2b</b> |           | 0°         | 180° | -572.0844  | -572.1816 |
| <b>1b</b> |           | 0°         | 180° | -572.0518  | -572.0826 |
| <b>3b</b> | bEE       | 180°       | 180° | -571.9744  | -572.2561 |
| <b>2b</b> |           | 180°       | 180° | -572.0854  | -572.1809 |
| <b>1b</b> |           | 180°       | 180° | -572.0516  | -572.0822 |
| <b>3c</b> | cZ        | 0°         | 0°   | -555.9193  | -556.1930 |
| <b>2c</b> |           | 0°         | 0°   | -556.0369  | -556.1260 |
| <b>1c</b> |           | 0°         | 0°   | -556.0102  | -556.0342 |
| <b>3c</b> | cE        | 0°         | 180° | -555.9204  | -556.1912 |
| <b>2c</b> |           | 0°         | 180° | -556.0365  | -556.1249 |
| <b>1c</b> |           | 0°         | 180° | -556.0085  | -556.0335 |
| <b>3d</b> | d         | -          | -    | -539.8663  | -540.1257 |
| <b>2d</b> |           | -          | -    | -539.9874  | -540.0677 |
| <b>1d</b> |           | -          | -    | -539.9655  | -539.9843 |

Table S2. LUMO energies (eV) for compounds 1, and SOMO energies (eV) for compounds 2

|           | Vacuo  | DMF    |
|-----------|--------|--------|
| <b>1d</b> | -1,641 | -1,628 |
| <b>1c</b> | -1,777 | -1,828 |
| <b>1b</b> | -1,905 | -2,005 |
| <b>1a</b> | -2,161 | -2,115 |
|           |        |        |
| <b>2d</b> | 0,676  | -2,648 |
| <b>2c</b> | 0,543  | -2,899 |
| <b>2b</b> | 0,411  | -3,107 |
| <b>2a</b> | 0,176  | -3,212 |

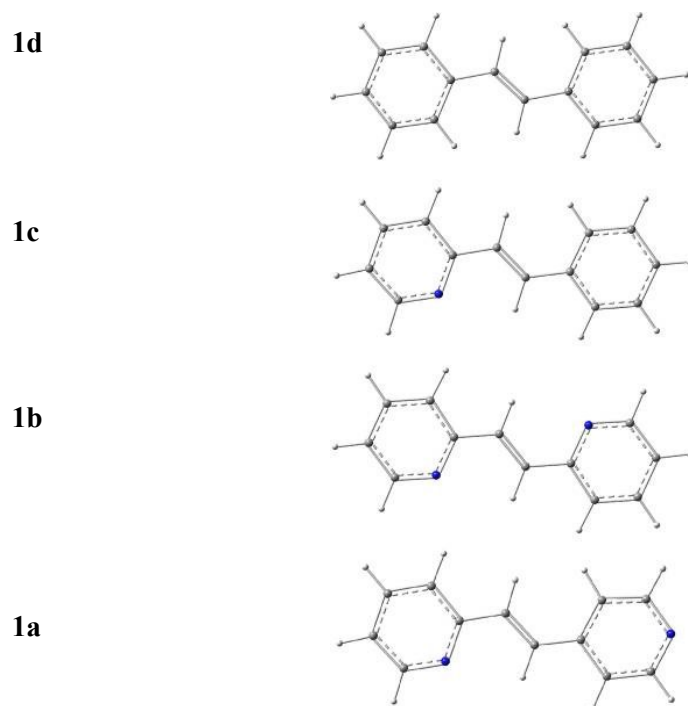

**Figure S1.** PBE0/6-311+G(d,p)/IEFPCM(DMF) global minima for compounds **1a-d**

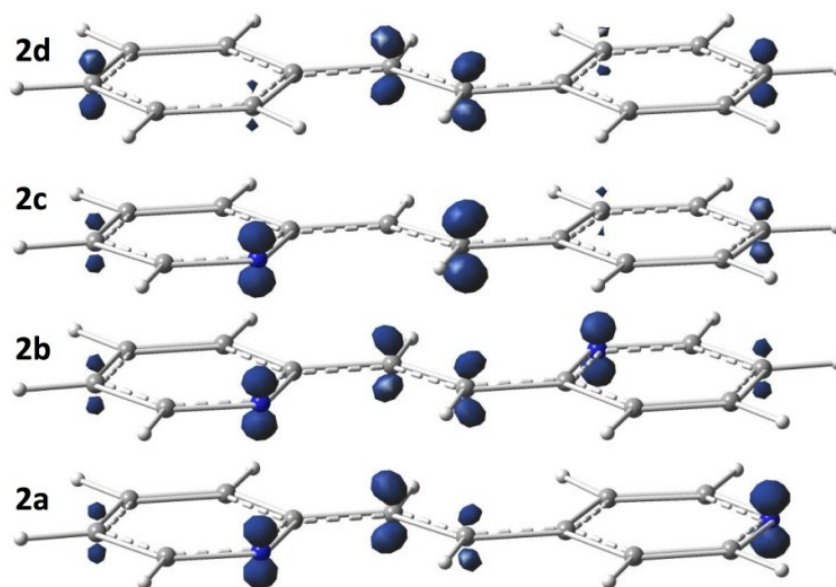

**Figure S2** Spin density, calculated at the PBE0/6-311+G(d,p)/IEFPCM(DMF) level. The blue surfaces connect the points where the spin density is  $0.02 \text{ au}/\text{A}^3$

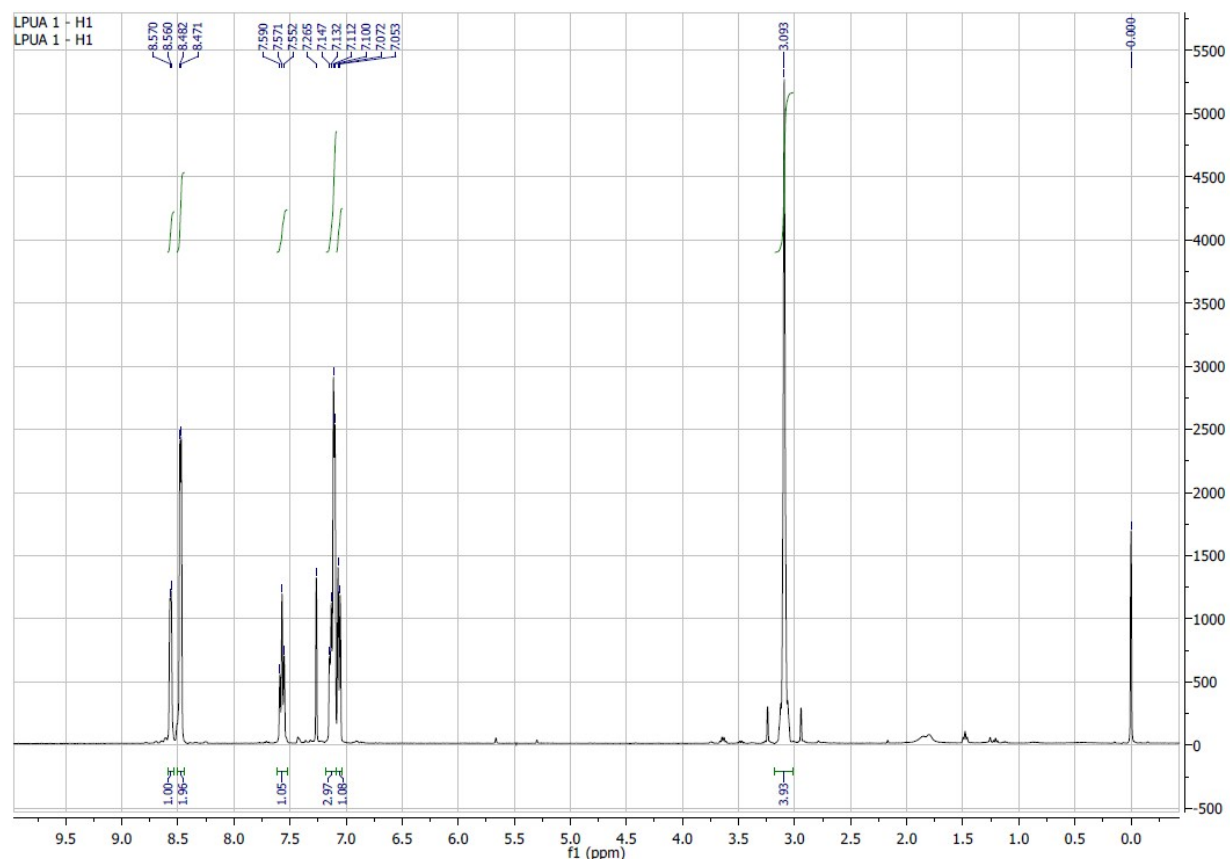

$^1\text{H}$  NMR (400 MHz) in  $\text{CDCl}_3$  of 1-(2-pyridyl)-2-(4-pyridyl)ethane (**4a**)

LPUA 1 - C - C13.1.fid  
LPUA 1 - C - C13

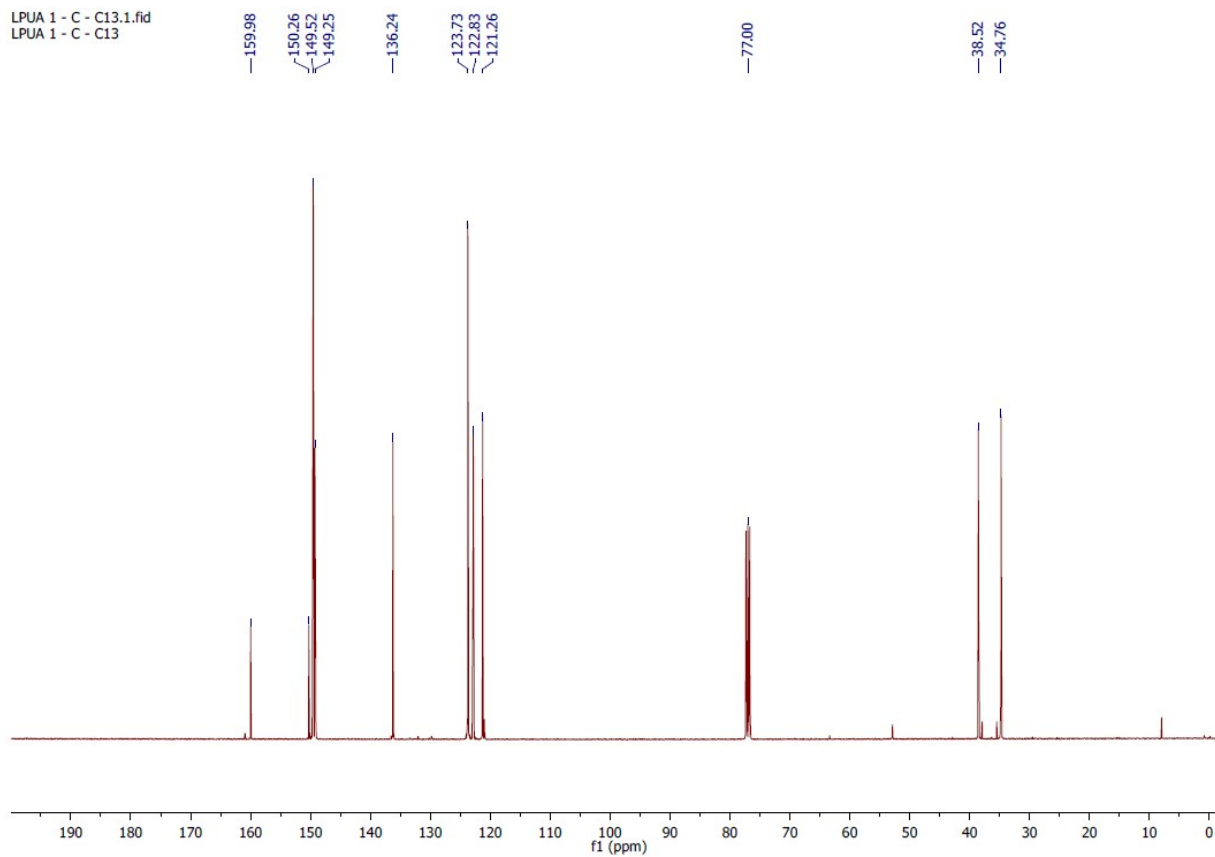

$^{13}\text{C}$  NMR (100 MHz) in  $\text{CDCl}_3$  of 1-(2-Pyridyl)-2-(4-pyridyl)ethane (**4a**)

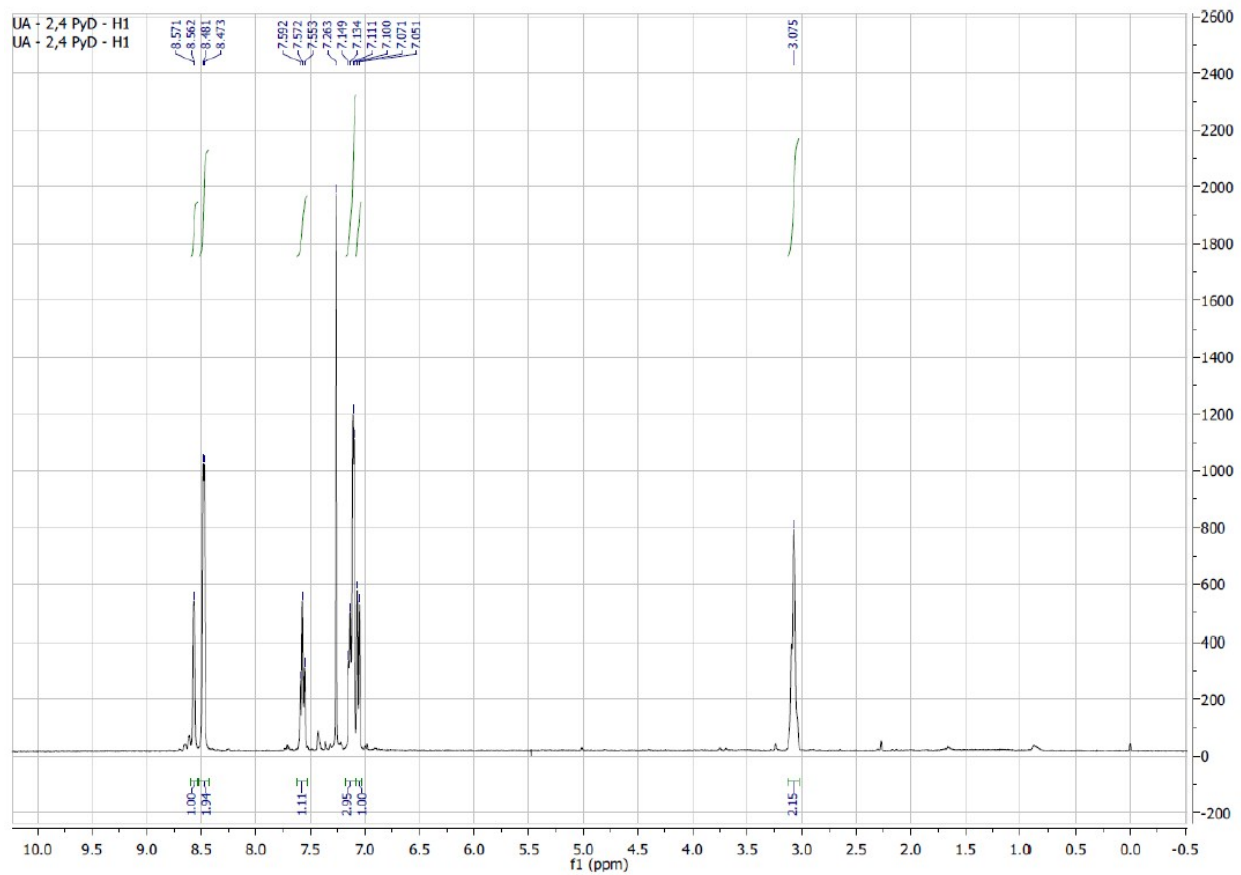

$^1\text{H}$  NMR (400 MHz) in  $\text{CDCl}_3$  of 1,2-Dideutero-1-(2-Pyridyl)-2-(4-pirydy)ethane (**4a<sub>d2</sub>**)



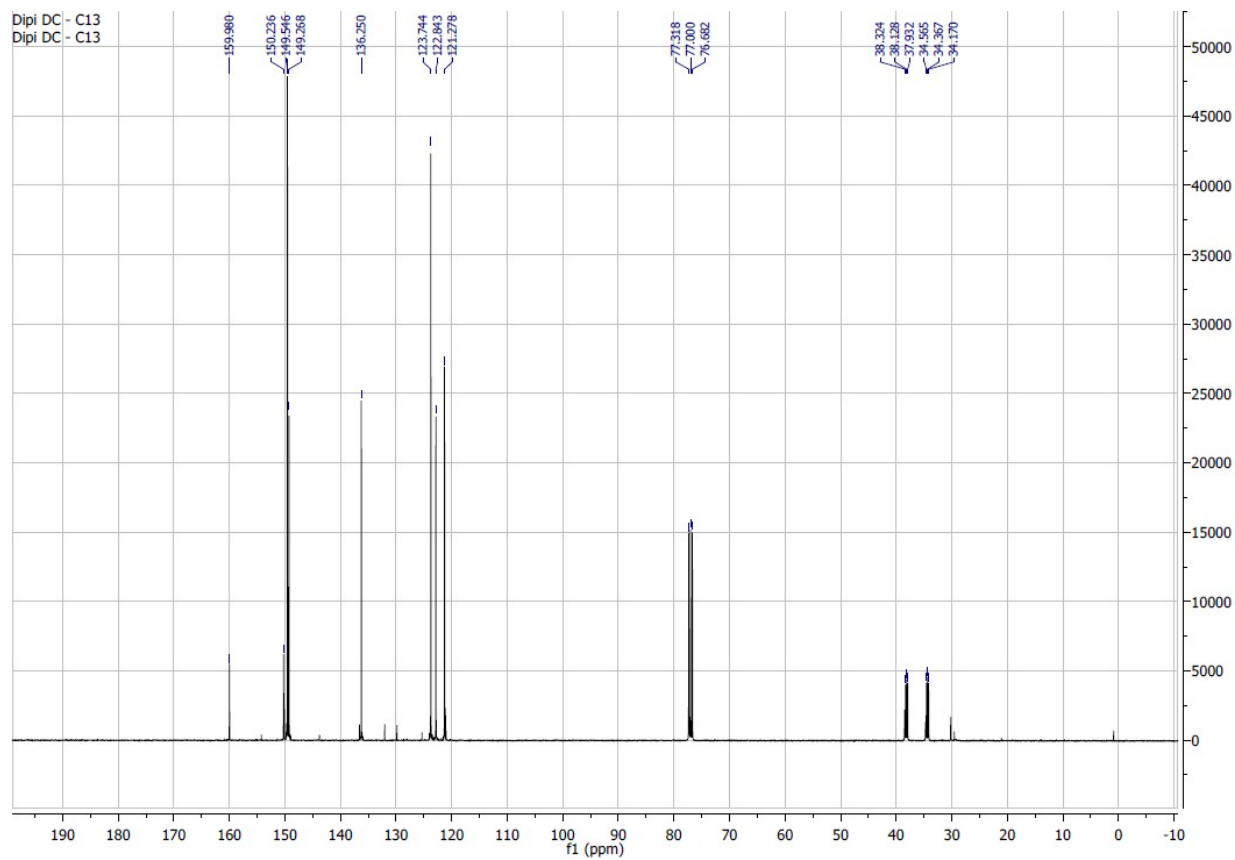

$^{13}\text{C}$  NMR (100 MHz) in  $\text{CDCl}_3$  of 1,2-Dideutero-1-(2-Pyridyl)-2-(4-pyridyl)ethane (**4a<sub>d2</sub>**)

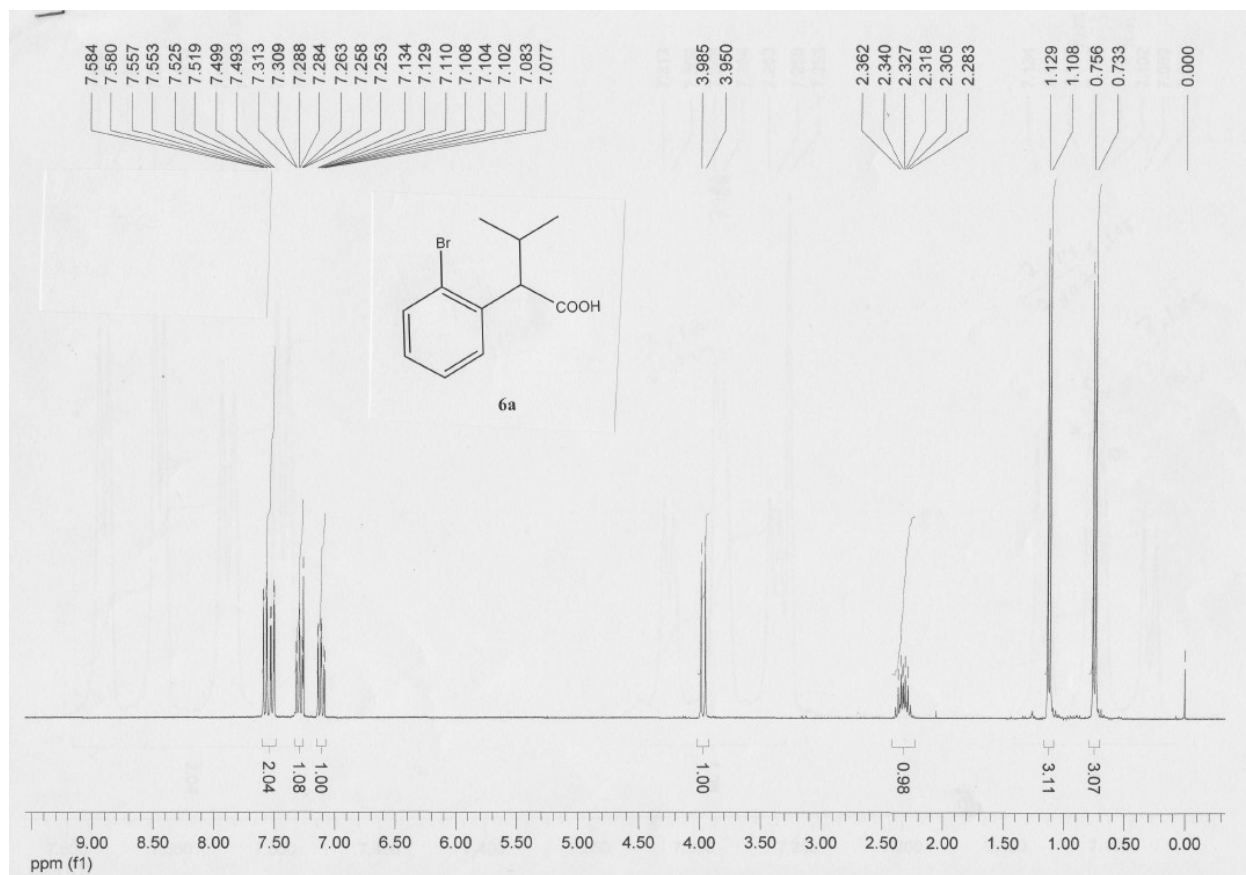

$^1\text{H-NMR}$  (300 MHz) in  $\text{CDCl}_3$  of 2-(2-Bromophenyl)-3-methylbutanoic acid (**6a**)

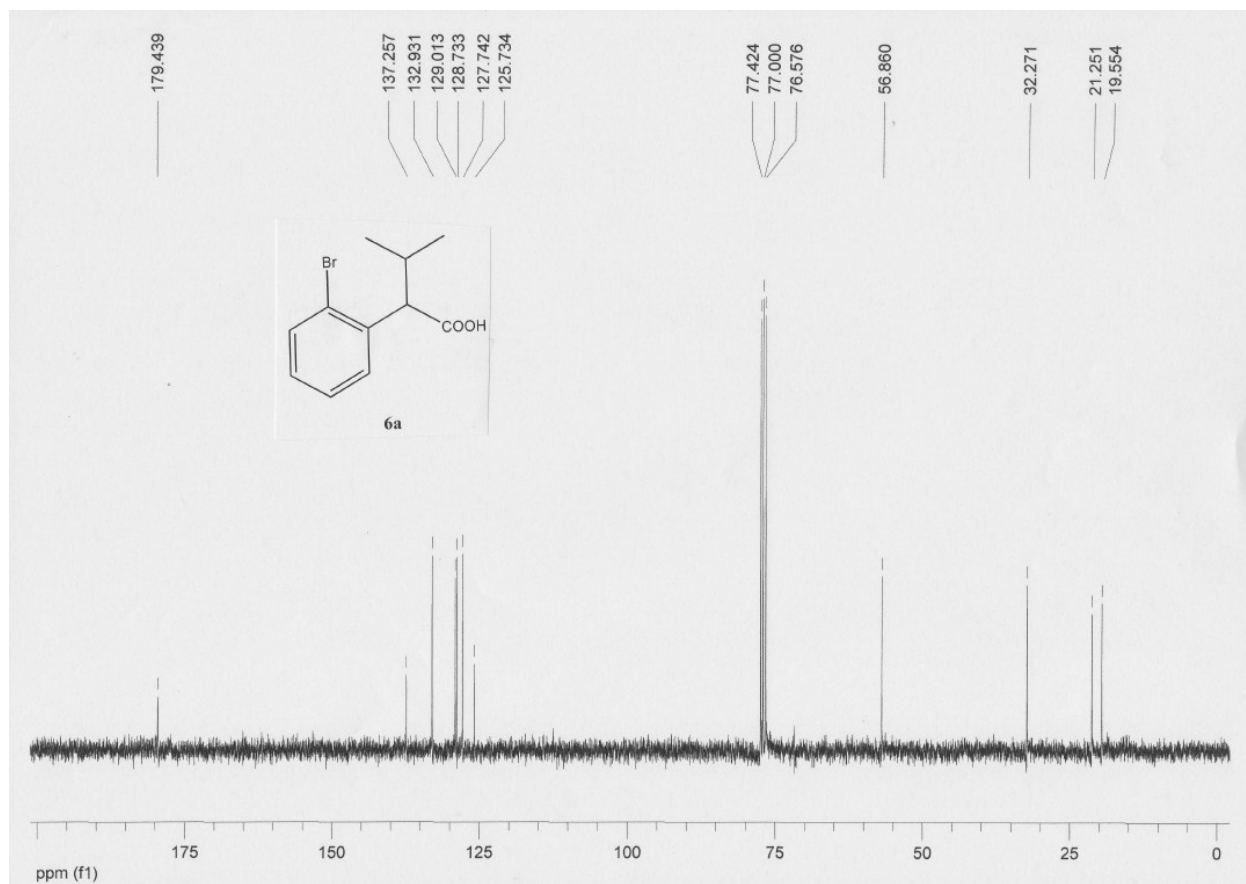

$^{13}\text{C}$ -NMR (75 MHz) in  $\text{CDCl}_3$  of 2-(2-Bromophenyl)-3-methylbutanoic acid (**6a**)

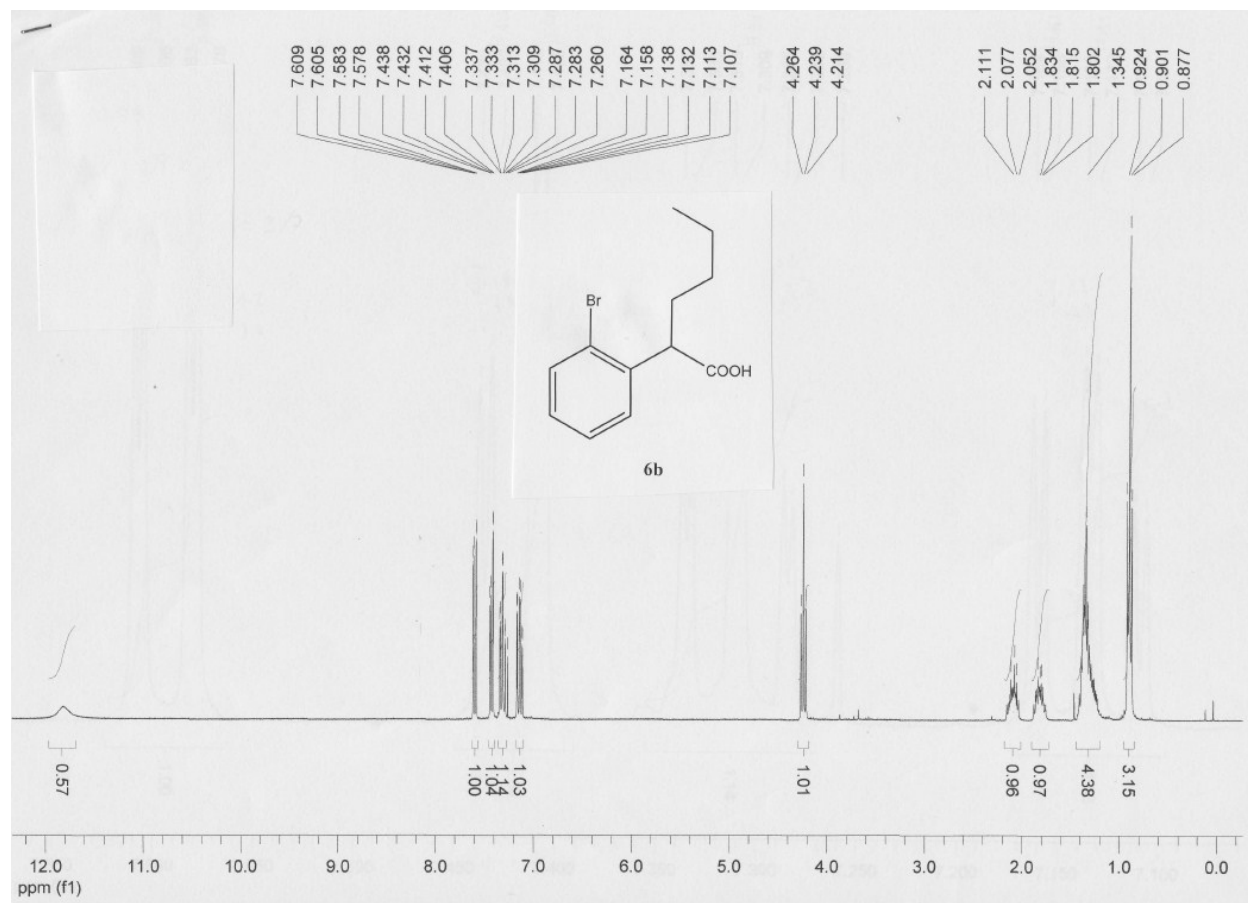

<sup>1</sup>H-NMR (300 MHz) in CDCl<sub>3</sub> of 2-(2-Bromophenyl)hexanoic acid (**6b**)

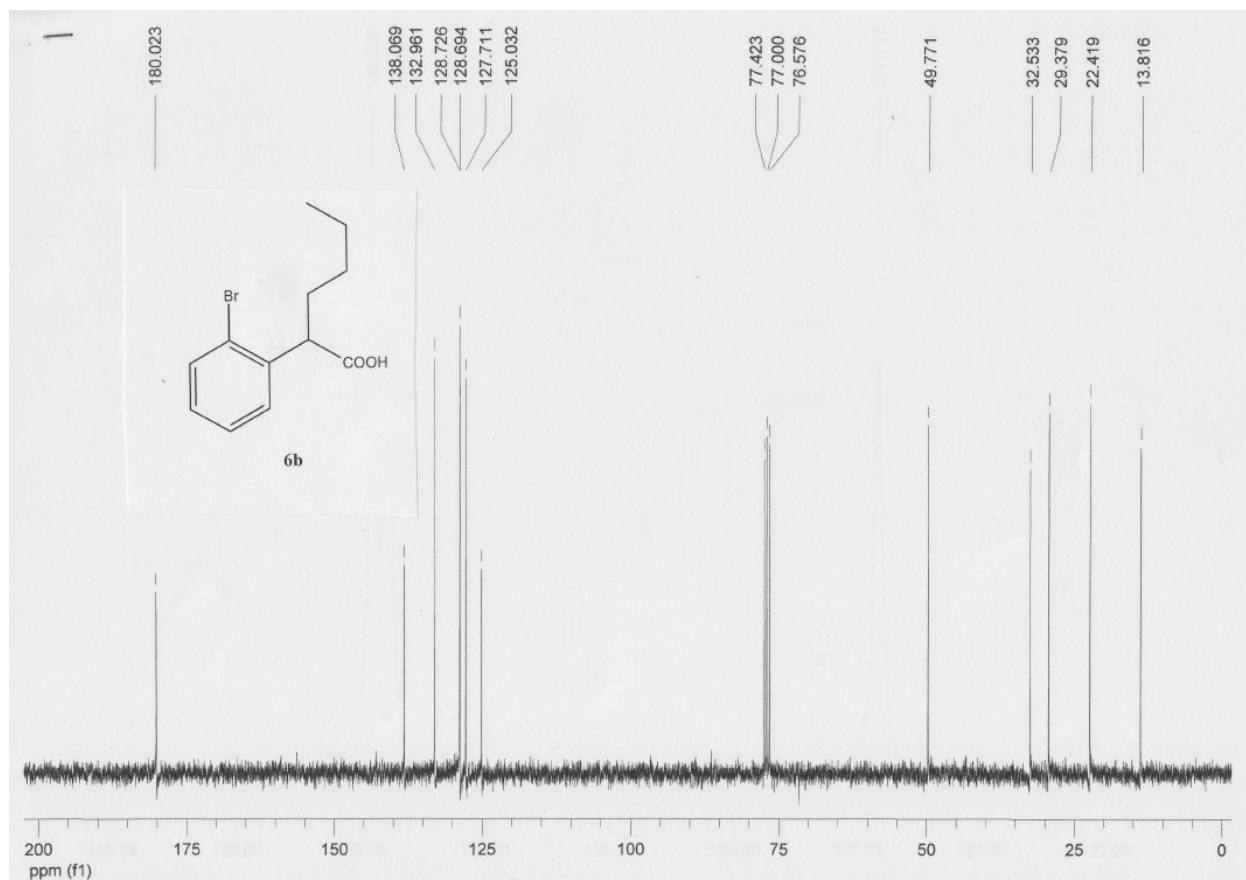

$^{13}\text{C}$ -NMR (75 MHz) in  $\text{CDCl}_3$  of 2-(2-Bromophenyl)hexanoic acid (**6b**)
